# Supplementary material for: Stocky1, a Novel Gene Involved in Maize Seedling Development and Cuticle Integrity
Source: MDPI journal article supplement (doi:10.3390/plants11070847), 2022-03-23
Supplement: s1 [file s1]

**Figure S2. Sequences alignment of the coding sequence of the gene GRMZM2G569948**

Alignment of the coding sequence of KCS (GRMZM2G569948) with sequences obtained through Sanger sequencing of PCR based products. 3 primers were used for the sequencing: ZmKCS-3F, ZmKCS-2R, ZmKCS-3R. The sequences of the primers can be found in the Table of primers in the supplementary materials. The coding sequence of KCS (GRMZM2G569948) was downloaded from maizegdb.org ID: ZEAMMB73\_Zm00001d016438

|                 |                                                                                    |  |
|-----------------|------------------------------------------------------------------------------------|--|
|                 | ..... ..... ..... ..... ..... ..... ..... ..... ..... .....                        |  |
|                 | 10                  20                  30                  40                  50 |  |
| <b>KcsB73</b>   | ATGGAAAACC CGGCGCCGCC GACCAACCCG GCCTCCGCCA CGCCGTCGCC                             |  |
| <b>KCS3Fdes</b> | ATGGAAAACC CGGCGCCGCC GACCAACCCG GCCTCCGCCA CGCCGTCGCC                             |  |
| <b>KCS3FWT</b>  | ATGGAAAACC CGGCGCCGCC GACCAACCCG GCCTCCGCCA CGCCGTCGCC                             |  |
| <b>Kcs2Rdes</b> | -----                                                                              |  |
| <b>Kcs2RWT</b>  | -----                                                                              |  |
| <b>KCS3Rdes</b> | -----                                                                              |  |
| <b>KCS3RWT</b>  | -----                                                                              |  |

|                 |                                                                                    |  |
|-----------------|------------------------------------------------------------------------------------|--|
|                 | ..... ..... ..... ..... ..... ..... ..... ..... ..... .....                        |  |
|                 | 60                  70                  80                  90                 100 |  |
| <b>KcsB73</b>   | GTCGCGGCAG CTGCCGGA CTCCAGCAGTC GGTTCGTCTC AAGTACGTGA                              |  |
| <b>KCS3Fdes</b> | GTCGCGGCAG CTGCCGGA CTCCAGCAGTC GGTTCGTCTC AAGTACGTGA                              |  |
| <b>KCS3FWT</b>  | GTCGCGGCAG CTGCCGGA CTCCAGCAGTC GGTTCGTCTC AAGTACGTGA                              |  |
| <b>Kcs2Rdes</b> | -----                                                                              |  |
| <b>Kcs2RWT</b>  | -----                                                                              |  |
| <b>KCS3Rdes</b> | -----                                                                              |  |
| <b>KCS3RWT</b>  | -----                                                                              |  |

|                 |                                                                                     |  |
|-----------------|-------------------------------------------------------------------------------------|--|
|                 | ..... ..... ..... ..... ..... ..... ..... ..... ..... .....                         |  |
|                 | 110                 120                 130                 140                 150 |  |
| <b>KcsB73</b>   | AGCTGGGGTA CCATTACCTC ATCACCACG GCATGTACCT GCTGCTCACC                               |  |
| <b>KCS3Fdes</b> | AGCTGGGGTA CCATTACCTC ATCACCACG GCATGTACCT GCTGCTCACC                               |  |
| <b>KCS3FWT</b>  | AGCTGGGGTA CCATTACCTC ATCACCACG GCATGTACCT GCTGCTCACC                               |  |
| <b>Kcs2Rdes</b> | -----                                                                               |  |
| <b>Kcs2RWT</b>  | -----                                                                               |  |
| <b>KCS3Rdes</b> | -----                                                                               |  |
| <b>KCS3RWT</b>  | -----                                                                               |  |

|                 |                                                                                     |  |
|-----------------|-------------------------------------------------------------------------------------|--|
|                 | ..... ..... ..... ..... ..... ..... ..... ..... ..... .....                         |  |
|                 | 160                 170                 180                 190                 200 |  |
| <b>KcsB73</b>   | CCGCTGATGG TGCTCGTGGC CGTGTA CTCCAGCTCT CCCC GCGCGA                                 |  |
| <b>KCS3Fdes</b> | CCGCTGATGG TGCTCGTGGC CGTGTA CTCCAGCTCT CCCC GCGCGA                                 |  |
| <b>KCS3FWT</b>  | CCGCTGATGG TGCTCGTGGC CGTGTA CTCCAGCTCT CCCC GCGCGA                                 |  |
| <b>Kcs2Rdes</b> | -----                                                                               |  |
| <b>Kcs2RWT</b>  | -----                                                                               |  |
| <b>KCS3Rdes</b> | -----                                                                               |  |
| <b>KCS3RWT</b>  | -----                                                                               |  |

|                 |                                                                                     |  |
|-----------------|-------------------------------------------------------------------------------------|--|
|                 | ..... ..... ..... ..... ..... ..... ..... ..... ..... .....                         |  |
|                 | 210                 220                 230                 240                 250 |  |
| <b>KcsB73</b>   | CGTCGCCGAC CTGTGGG-CG CACCTCCGCC TCAACCTCAT CTCCGTGCTC                              |  |
| <b>KCS3Fdes</b> | CGTCGCCGAC CTGTGGG-CG CACCTCCGCC TCAACCTCAT CTCCGTGCTG                              |  |
| <b>KCS3FWT</b>  | CGTCGCCGAC CTGTGGG-CG CACCTCCGCC TCAACCTCAT CTCCGTGCTC                              |  |
| <b>Kcs2Rdes</b> | -----                                                                               |  |
| <b>Kcs2RWT</b>  | CGTCGCCGAC CTGTGGGGCG CACCTCCGCC TCAACCTCAT CTCCGTGCTC                              |  |
| <b>KCS3Rdes</b> | -----                                                                               |  |
| <b>KCS3RWT</b>  | -----                                                                               |  |

|                 |                                                                                     |  |
|-----------------|-------------------------------------------------------------------------------------|--|
|                 | ..... ..... ..... ..... ..... ..... ..... ..... ..... .....                         |  |
|                 | 260                 270                 280                 290                 300 |  |
| <b>KcsB73</b>   | GCCTGCTCCA CGCTCCTCGT CTTCTCGGC ACGGCCTACT TCCTCACCCG                               |  |
| <b>KCS3Fdes</b> | GCCTGCTCCA CGCTCCTCGT CTTCTCGGC ACGGCCTACT TCCTCACCCG                               |  |
| <b>KCS3FWT</b>  | GCCTGCTCCA CGCTCCTCGT CTTCTCGGC ACGGCCTACT TCCTCACCCG                               |  |
| <b>Kcs2Rdes</b> | -----                                                                               |  |
| <b>Kcs2RWT</b>  | GCCTGCTCCA CGCTCCTCGT CTTCTCGGC ACGGCCTACT TCCTCACCCG                               |  |
| <b>KCS3Rdes</b> | -----                                                                               |  |
| <b>KCS3RWT</b>  | -----                                                                               |  |

.....|.....| .....|.....| .....|.....| .....|.....| .....|.....|  
310 320 330 340 350

|                 |            |            |            |            |             |
|-----------------|------------|------------|------------|------------|-------------|
| <b>KcsB73</b>   | CCCGCGG-CC | CGTGTACCTG | GTCGACTTCG | CCTGCTACAA | GCCCGGGGCCG |
| <b>KCS3Fdes</b> | CCCGCGG-CC | CGTGTACCTG | GTCGACTTCG | CCTGCTACAA | GCCCGGGGCCG |
| <b>KCS3FWT</b>  | CCCGCGG-CC | CGTGTACCTG | GTCGACTTCG | CCTGCTACAA | GCCCGGGGCCG |
| <b>Kcs2Rdes</b> | CCCGCGGGCC | CGTGTACCTG | GTCGACTTCG | CCTGCTACAA | GCCCGGGGCCG |
| <b>Kcs2RWT</b>  | CCCGCGG-CC | CGTGTACCTG | GTCGACTTCG | CCTGCTACAA | GCCCGGGGCCG |
| <b>KCS3Rdes</b> | -----      | -----      | -----      | -----      | -----       |
| <b>KCS3RWT</b>  | -----      | -----      | -----      | -----      | -----       |

.....|.....| .....|.....| .....|.....| .....|.....| .....|.....|  
360 370 380 390 400

|                 |            |            |            |            |             |
|-----------------|------------|------------|------------|------------|-------------|
| <b>KcsB73</b>   | GAGCGCCGGT | GCACGCGCGA | CACCTTCATG | CGCTGCTCCA | GGCTCACC GG |
| <b>KCS3Fdes</b> | GAGCGCCGGT | GCACGCGCGA | CACCTTCATG | CGCTGCTCCA | GGCTCACC GG |
| <b>KCS3FWT</b>  | GAGCGCCGGT | GCACGCGCGA | CACCTTCATG | CGCTGCTCCA | GGCTCACC GG |
| <b>Kcs2Rdes</b> | GAGCGTCGGT | GCACGCGCGA | CACCTTCATG | CGCTGCTCCA | GGCTCACC GG |
| <b>Kcs2RWT</b>  | GAGCGCCGGT | GCACGCGCGA | CACCTTCATG | CGCTGCTCCA | GGCTCACC GG |
| <b>KCS3Rdes</b> | -----      | -----      | -----      | -----      | -----       |
| <b>KCS3RWT</b>  | -----      | -----      | -----      | -----      | -----       |

.....|.....| .....|.....| .....|.....| .....|.....| .....|.....|  
410 420 430 440 450

|                 |            |            |            |            |            |
|-----------------|------------|------------|------------|------------|------------|
| <b>KcsB73</b>   | CTGCTTCACC | GACGCCAGCC | TCGAGTTCCA | GCGCAAGATC | CTGGAGCGCT |
| <b>KCS3Fdes</b> | CTGCTTCACC | GACGCCAGCC | TCGAGTTCCA | GCGCAAGATC | CTGGAGCGCT |
| <b>KCS3FWT</b>  | CTGCTTCACC | GACGCCAGCC | TCGAGTTCCA | GCGCAAGATC | CTGGAGCGCT |
| <b>Kcs2Rdes</b> | CTGCTTCACT | GACGCCAGCC | TCGAGTTCCA | GCGCAAGATC | CTGGAGCGCT |
| <b>Kcs2RWT</b>  | CTGCTTCACC | GACGCCAGCC | TCGAGTTCCA | GCGCAAGATC | CTGGAGCGCT |
| <b>KCS3Rdes</b> | -----      | -----      | -----      | -----      | -----      |
| <b>KCS3RWT</b>  | -----      | -----      | -----      | -----      | -----      |

.....|.....| .....|.....| .....|.....| .....|.....| .....|.....|  
460 470 480 490 500

|                 |            |            |            |            |            |
|-----------------|------------|------------|------------|------------|------------|
| <b>KcsB73</b>   | CGGGGCTGGG | CGAGGACACG | TACCTTCCCC | CCGCCGTCAC | GCGGGTGCCG |
| <b>KCS3Fdes</b> | CGGGGCTGGG | CGAGGACACG | TACCTTCCCC | CCGCCGTCAC | GCGGGTGCCG |
| <b>KCS3FWT</b>  | CGGGGCTGGG | CGAGGACACG | TACCTTCCCC | CCGCCGTCAC | GCGGGTGCCG |
| <b>Kcs2Rdes</b> | CGGGGCTGGG | CGAGGACACG | TACCTTCCCC | CCGCCGTCAC | GCGGGTGCCG |
| <b>Kcs2RWT</b>  | CGGGGCTGGG | CGAGGACACG | TACCTTCCCC | CCGCCGTCAC | GCGGGTGCCG |
| <b>KCS3Rdes</b> | -----      | -----      | -----      | -----      | -----      |
| <b>KCS3RWT</b>  | -----      | -----      | -----      | -----      | -----      |

.....|.....| .....|.....| .....|.....| .....|.....| .....|.....|  
510 520 530 540 550

|                 |            |            |            |            |            |
|-----------------|------------|------------|------------|------------|------------|
| <b>KcsB73</b>   | CCCAACCCGT | CCATGGACGA | GGCGCGCGCG | GAGGCGCGGG | AGGTCATGTT |
| <b>KCS3Fdes</b> | CCCAACCCGT | CCATGGACGA | GGCGCGCGCG | GAGGCGCGGG | AGGTCATGTT |
| <b>KCS3FWT</b>  | CCCAACCCGT | CCATGGACGA | GGCGCGCGCG | GAGGCGCGGG | AGGTCATGTT |
| <b>Kcs2Rdes</b> | CCCAACCCGT | CCATGGACGA | GGCGCGCGCG | GAGGCGCGGG | AGGTCATGTT |
| <b>Kcs2RWT</b>  | CCCAACCCGT | CCATGGACGA | GGCGCGCGCG | GAGGCGCGGG | AGGTCATGTT |
| <b>KCS3Rdes</b> | -----      | -----      | -----      | -----      | -----      |
| <b>KCS3RWT</b>  | -----      | -----      | -----      | -----      | -----      |

.....|.....| .....|.....| .....|.....| .....|.....| .....|.....|  
560 570 580 590 600

|                 |            |            |            |            |            |
|-----------------|------------|------------|------------|------------|------------|
| <b>KcsB73</b>   | CGGCGCCGTT | GACGAGCTGC | TCGCCAAGAC | GGGGGTCAAG | CCCAAAGACA |
| <b>KCS3Fdes</b> | CGGCGCCGTT | GACGAGCTGC | TCGCCAAGAC | GGGGGTCAAG | CCCAAAGACA |
| <b>KCS3FWT</b>  | CGGCGCCGTT | GACGAGCTGC | TCGCCAAGAC | GGGGGTCAAG | CCCAAAGACA |
| <b>Kcs2Rdes</b> | CGGCGCCGTT | GACGAGCTGC | TCGCCAAGAC | GGGGGTCAAG | CCCAAAGACA |
| <b>Kcs2RWT</b>  | CGGCGCCGTT | GACGAGCTGC | TCGCCAAGAC | GGGGGTCAAG | CCCAAAGACA |
| <b>KCS3Rdes</b> | -----      | -----      | -----      | -----      | -----      |
| <b>KCS3RWT</b>  | -----      | -----      | -----      | -----      | -----      |

.....|.....| .....|.....| .....|.....| .....|.....| .....|.....|  
610 620 630 640 650

|                 |            |            |            |            |            |
|-----------------|------------|------------|------------|------------|------------|
| <b>KcsB73</b>   | TCGGGATCCT | CGTGGTGAAC | TGCAGCCTGT | TCAACCCGAC | GCCGTCGCTG |
| <b>KCS3Fdes</b> | TCGGGATCCT | CGTGGTGAAC | TGCAGCCTGT | TCAACCCGAC | GCCGTCGCTG |
| <b>KCS3FWT</b>  | TCGGGATCCT | CGTGGTGAAC | TGCAGCCTGT | TCAACCCGAC | GCCGTCGCTG |

|                 |            |            |            |            |            |
|-----------------|------------|------------|------------|------------|------------|
| <b>Kcs2Rdes</b> | TCGGGATCCT | CGTGGTGAAC | TGCAGCCTGT | TCAACCCGAC | GCCGTCGCTG |
| <b>Kcs2RWT</b>  | TCGGGATCCT | CGTGGTGAAC | TGCAGCCTGT | TCAACCCGAC | GCCGTCGCTG |
| <b>KCS3Rdes</b> | -----      | -----      | -----      | -----      | -----      |
| <b>KCS3RWT</b>  | -----      | -----      | -----      | -----      | -----      |
|                 | .... ....  | .... ....  | .... ....  | .... ....  | .... ....  |
|                 | 660        | 670        | 680        | 690        | 700        |
| <b>KcsB73</b>   | TCGGCCATGG | TGGTCAACCA | CTACAAGCTG | CGCGGGAACG | TGGTGAGCTA |
| <b>KCS3Fdes</b> | TCGGCCATGG | TGGTCAACCA | CTACAAGCTG | CGCGGGAACG | TGGTGAGCTA |
| <b>KCS3FWT</b>  | TCGGCCATGG | TGGTCAACCA | CTACAAGCTG | CGCGGGAACG | TGGTGAGCTA |
| <b>Kcs2Rdes</b> | TCGGCCATGG | TGGTCAACCA | CTACAAGCTG | CGCGGGAACG | TGGTGAGCTA |
| <b>Kcs2RWT</b>  | TCGGCCATGG | TGGTCAACCA | CTACAAGCTG | CGCGGGAACG | TGGTGAGCTA |
| <b>KCS3Rdes</b> | -----      | -----      | -----      | -----      | -----      |
| <b>KCS3RWT</b>  | -----      | -----      | -----      | -----      | -----      |
|                 | .... ....  | .... ....  | .... ....  | .... ....  | .... ....  |
|                 | 710        | 720        | 730        | 740        | 750        |
| <b>KcsB73</b>   | CAACCTCGGC | GGGATGGGGT | GCAGCGCC-G | GGCTGCTGTC | CGTGGACCTC |
| <b>KCS3Fdes</b> | CAACCTCGGC | GGGATGGGGT | GCAGCGCCCG | GGCTGCTGTC | CGTGGACCTC |
| <b>KCS3FWT</b>  | CAACCTCGGC | GGGATGGGGT | GCAGCGCC-G | GGCTGCTGTC | CGTGGACCTC |
| <b>Kcs2Rdes</b> | CAACCTCGGC | GGGATGGGGT | GCAGCGCC-G | GGCTGCTGTC | CGTGGACCTC |
| <b>Kcs2RWT</b>  | CAACCTCGGC | GGGATGGGGT | GCAGCGCC-G | GGCTGCTGTC | CGTGGACCTC |
| <b>KCS3Rdes</b> | -----      | -----      | -----      | -----      | ~~~~~      |
| <b>KCS3RWT</b>  | -----      | -----      | -----      | ~~~~~      | ~~~~~      |
|                 | .... ....  | .... ....  | .... ....  | .... ....  | .... ....  |
|                 | 760        | 770        | 780        | 790        | 800        |
| <b>KcsB73</b>   | GCCAAGGACC | TGCTGCAGAC | GCACCCGGGG | TCGTACGCGC | TGGTCATCAG |
| <b>KCS3Fdes</b> | -----      | -----      | -----      | -----      | -----      |
| <b>KCS3FWT</b>  | GCCAAGGACC | TGCTGCAGAC | GCACCCGGGG | TCGTACGCGC | TGGTCATCAG |
| <b>Kcs2Rdes</b> | GCCAAGGACC | TGCTGCAGAC | GCACCCGGGG | TCGTACGCGC | TGGTCATCAG |
| <b>Kcs2RWT</b>  | GCCAAGGACC | TGCTGCAGAC | GCACCCGGGG | TCGTACGCGC | TGGTCATCAG |
| <b>KCS3Rdes</b> | ~~~~~      | ~~~~~      | ~~~~~      | TCGTACGCGC | TGGTCATCAG |
| <b>KCS3RWT</b>  | ~~~~~      | ~~~~~      | ~~~~~      | TCGTACGCGC | TGGTCATCAG |
|                 | .... ....  | .... ....  | .... ....  | .... ....  | .... ....  |
|                 | 810        | 820        | 830        | 840        | 850        |
| <b>KcsB73</b>   | CACGGAGAAC | ATCACGCTCA | ACTGGTACTC | GGGGAACGAC | CGCTCCAAGC |
| <b>KCS3Fdes</b> | -----      | -----      | -----      | -----      | -----      |
| <b>KCS3FWT</b>  | C-----     | -----      | -----      | -----      | -----      |
| <b>Kcs2Rdes</b> | CACGGAGAAC | ATCACGCTCA | ACTGGTACTC | GGGGAACGAC | CGCTCCAAGC |
| <b>Kcs2RWT</b>  | CACGGAGAAC | ATCACGCTCA | ACTGGTACTC | GGGGAACGAC | CGCTCCAAGC |
| <b>KCS3Rdes</b> | CACGGAGAAC | ATCACGCTCA | ACTGGTACTC | GGGGAACGAC | CGCTCCAAGC |
| <b>KCS3RWT</b>  | CACGGAGAAC | ATCACGCTCA | ACTGGTACTC | GGGGAACGAC | CGCTCCAAGC |
|                 | .... ....  | .... ....  | .... ....  | .... ....  | .... ....  |
|                 | 860        | 870        | 880        | 890        | 900        |
| <b>KcsB73</b>   | TGGTGTCCAA | CTGCCTGTTC | CGGATGGGCG | GCGCCGCGGT | GCTGCTCTCG |
| <b>KCS3Fdes</b> | -----      | -----      | -----      | -----      | -----      |
| <b>KCS3FWT</b>  | -----      | -----      | -----      | -----      | -----      |
| <b>Kcs2Rdes</b> | TGGTGTCCAA | CTGCCTGTTC | CGGATGGGCG | GCGCCGCGGT | GCTGCTCTCG |
| <b>Kcs2RWT</b>  | TGGTGTCCAA | CTGCCTGTTC | CGGATGGGCG | GCGCCGCGGT | GCTGCTCTCG |
| <b>KCS3Rdes</b> | TGGTGTCCAA | CTGCCTGTTC | CGGATGGGCG | GCGCCGCGGT | GCTGCTCTCG |
| <b>KCS3RWT</b>  | TGGTGTCCAA | CTGCCTGTTC | CGGATGGGCG | GCGCCGCGGT | GCTGCTCTCG |
|                 | .... ....  | .... ....  | .... ....  | .... ....  | .... ....  |
|                 | 910        | 920        | 930        | 940        | 950        |
| <b>KcsB73</b>   | AATCGGCGGT | CCGACCGGCG | GCGGGCCAAG | TACGAGCTGG | TGCACACGGT |
| <b>KCS3Fdes</b> | -----      | -----      | -----      | -----      | -----      |
| <b>KCS3FWT</b>  | -----      | -----      | -----      | -----      | -----      |
| <b>Kcs2Rdes</b> | AATCGGCGGT | CCGACCGGCG | GCGGGCCAAG | TACGAGCTGG | TGCACACGGT |
| <b>Kcs2RWT</b>  | AATCGGCGGT | CCGACCGGCG | GCGGGCCAAG | TACGAGCTGG | TGCACACGGT |
| <b>KCS3Rdes</b> | AATCGGCGGT | CCGACCGGCG | GCGGGCCAAG | TACGAGCTGG | TGCACACGGT |
| <b>KCS3RWT</b>  | AATCGGCGGT | CCGACCGGCG | GCGGGCCAAG | TACGAGCTGG | TGCACACGGT |

.....|.....| .....|.....| .....|.....| .....|.....| .....|.....|  
                  960                  970                  980                  990                  1000

KcsB73

KCS3Fdes

KCS3FWT

Kcs2Rdes

Kcs2RWT

KCS3Rdes

KCS3RWT

GCGCACGCAC AAGGGCGCGG ACGACCGGTG CTTCGGCTGC GTGACGCAGG  
-----  
-----  
GCGCACGCAC AAGGGCGCGG ACGACCGGTG CTTCGGCTGC GTGACGCAGG  
GCGCACGCAC AAGGGCGCGG ACGACCGGTG CTTCGGCTGC GTGACGCAGG  
GCGCACGCAC AAGGGCGCGG ACGACCGGTG CTTCGGCTGC GTGACGCAGG  
GCGCACGCAC AAGGGCGCGG ACGACCGGTG CTTCGGCTGC GTGACGCAGG

.....|.....| .....|.....| .....|.....| .....|.....| .....|.....|  
                  1010                  1020                  1030                  1040                  1050

KcsB73

KCS3Fdes

KCS3FWT

Kcs2Rdes

Kcs2RWT

KCS3Rdes

KCS3RWT

AGGAGGACGG CGAGGGCGTC GTGGGCGTGT CGCTGTCGAG GGACCTGATG  
-----  
-----  
AGGAGGACGG CGAGGGCGTC GTGGGCGTGT CGCTGTCGAG GGACCTGATG  
AGGAGGACGG CGAGGGCGTC GTGGGCGTGT CGCTGTCGAG GGACCTGATG  
AGGAGGACGG CGAGGGCGTC GTGGGCGTGT CGCTGTCGAG GGACCTGATG  
AGGAGGACGG CGAGGGCGTC GTGGGCGTGT CGCTGTCGAG GGACCTGATG

.....|.....| .....|.....| .....|.....| .....|.....| .....|.....|  
                  1060                  1070                  1080                  1090                  1100

KcsB73

KCS3Fdes

KCS3FWT

Kcs2Rdes

Kcs2RWT

KCS3Rdes

KCS3RWT

GCGGTGGCGG GCGACGCGCT CAAGACGAAC ATAACAACGC TGGGCCCCGCT  
-----  
-----  
GCGGTGGCGG GCGACGCGCT CAAGACGAAC ATAACAACGC TGGGCCCCGCT  
GCGGTGGCGG GCGACGCGCT CAAGACGAAC ATAACAACGC TGGGCCCCGCT  
GCGGTGGCGG GCGACGCGCT CAAGACGAAC ATAACAACGC TGGGCCCCGCT  
GCGGTGGCGG GCGACGCGCT CAAGACGAAC ATAACAACGC TGGGCCCCGCT

.....|.....| .....|.....| .....|.....| .....|.....| .....|.....|  
                  1110                  1120                  1130                  1140                  1150

KcsB73

KCS3Fdes

KCS3FWT

Kcs2Rdes

Kcs2RWT

KCS3Rdes

KCS3RWT

GGTGCTGCCG CTGTCCGAGC AGCTGCTGTT CATGGCGACG CTGGTCGCCA  
-----  
-----  
GGTGCTGCCG CTGTCCGAGC AGCTGCTGTT -----  
GGTGCTGCCG CTGTCCGAGC AGCTGCTGTT -----  
GGTGCTGCCG CTGTCCGAGC AGCTGCTGTT CATGGCGACG CTGGTCGCCA  
GGTGCTGCCG CTGTCCGAGC AGCTGCTGTT CATGGCGACG CTGGTCGCCA

.....|.....| .....|.....| .....|.....| .....|.....| .....|.....|  
                  1160                  1170                  1180                  1190                  1200

KcsB73

KCS3Fdes

KCS3FWT

Kcs2Rdes

Kcs2RWT

KCS3Rdes

KCS3RWT

AGAAGCTGCT CAAGATGAAG AAGGTGAAGC CGTACATCCC GGATTTCAAA  
-----  
-----  
-----  
-----  
AGAAGCTGCT CAAGATGAAG AAGGTGAAGC CGTACATCCC GGATTTCAAA  
AGAAGCTGCT CAAGATGAAG AAGGTGAAGC CGTACATCCC GGATTTCAAA

.....|.....| .....|.....| .....|.....| .....|.....| .....|.....|  
                  1210                  1220                  1230                  1240                  1250

KcsB73

KCS3Fdes

KCS3FWT

Kcs2Rdes

Kcs2RWT

KCS3Rdes

KCS3RWT

CTGGCGTTTC AGCACTTCTG CATCCACGCC GGCGGCCGTG CCGTGCTGGA  
-----  
-----  
-----  
-----  
CTGGCGTTTC AGCACTTCTG CATCCACGCC GGCGGCCGTG CCGTGCTGGA  
CTGGCGTTTC AGCACTTCTG CATCCACGCC GGCGGCCGTG CCGTGCTGGA

.....|.....| .....|.....| .....|.....| .....|.....| .....|.....|  
                  1260                  1270                  1280                  1290                  1300

KcsB73

KCS3Fdes

KCS3FWT

Kcs2Rdes

CGAGCTGGAG AGCAACCTGG CGCTCACGGA TTGGCACATG GAGCCGTCGC  
-----  
-----  
-----

|                 |            |             |            |            |            |
|-----------------|------------|-------------|------------|------------|------------|
| <b>Kcs2RWT</b>  | -----      | -----       | -----      | -----      | -----      |
| <b>KCS3Rdes</b> | CGAGCTGGAG | AGCAACCTGG  | CGCTCACGGA | TTGGCACATG | GAGCCGTCGC |
| <b>KCS3RWT</b>  | CGAGCTGGAG | AGCAACCTGG  | CGCTCACGGA | TTGGCACATG | GAGCCGTCGC |
|                 | .... ....  | .... ....   | .... ....  | .... ....  | .... ....  |
|                 | 1310       | 1320        | 1330       | 1340       | 1350       |
| <b>KcsB73</b>   | GGATGACGCT | GCACCGGTTTC | GGGAACACGT | CCAGCAGCTC | GCTCTGGTAC |
| <b>KCS3Fdes</b> | -----      | -----       | -----      | -----      | -----      |
| <b>KCS3FWT</b>  | -----      | -----       | -----      | -----      | -----      |
| <b>Kcs2Rdes</b> | -----      | -----       | -----      | -----      | -----      |
| <b>Kcs2RWT</b>  | -----      | -----       | -----      | -----      | -----      |
| <b>KCS3Rdes</b> | GGATGACGCT | GCACCGGTTTC | GGGAACACGT | CCAGCAGCTC | GCTCTGGTAC |
| <b>KCS3RWT</b>  | GGATGACGCT | GCACCGGTTTC | GGGAACACGT | CCAGCAGCTC | GCTCTGGTAC |
|                 | .... ....  | .... ....   | .... ....  | .... ....  | .... ....  |
|                 | 1360       | 1370        | 1380       | 1390       | 1400       |
| <b>KcsB73</b>   | GAGCTGGCCT | ACAGCGAGGC  | CAAGGGGAGG | ATCCGGCGCC | GCCACCGGGT |
| <b>KCS3Fdes</b> | -----      | -----       | -----      | -----      | -----      |
| <b>KCS3FWT</b>  | -----      | -----       | -----      | -----      | -----      |
| <b>Kcs2Rdes</b> | -----      | -----       | -----      | -----      | -----      |
| <b>Kcs2RWT</b>  | -----      | -----       | -----      | -----      | -----      |
| <b>KCS3Rdes</b> | GAGCTGGCCT | ACAGCGAGGC  | CAAGGGGAGG | ATCCGGCGCC | GCCACCGGGT |
| <b>KCS3RWT</b>  | GAGCTGGCCT | ACAGCGAGGC  | CAAGGGGAGG | ATCCGGCGCC | GCCACCGGGT |
|                 | .... ....  | .... ....   | .... ....  | .... ....  | .... ....  |
|                 | 1410       | 1420        | 1430       | 1440       | 1450       |
| <b>KcsB73</b>   | GTGGCAGATC | GCGTTCGGGT  | CAGGGTTCAA | GTGCAACAGC | GCCGTGTGGA |
| <b>KCS3Fdes</b> | -----      | -----       | -----      | -----      | -----      |
| <b>KCS3FWT</b>  | -----      | -----       | -----      | -----      | -----      |
| <b>Kcs2Rdes</b> | -----      | -----       | -----      | -----      | -----      |
| <b>Kcs2RWT</b>  | -----      | -----       | -----      | -----      | -----      |
| <b>KCS3Rdes</b> | GTGGCAGATC | GCGTTCGGGT  | CAGGGTTCAA | GTGCAACAGC | GCCGTGTGGA |
| <b>KCS3RWT</b>  | GTGGCAGATC | GCGTTCGGGT  | CAGGGTTCAA | GTGCAACAGC | GCCGTGTGGA |
|                 | .... ....  | .... ....   | .... ....  | .... ....  | .... ....  |
|                 | 1460       | 1470        | 1480       | 1490       | 1500       |
| <b>KcsB73</b>   | GGGCGCTCCG | GTCGGTGAAC  | CCGGCGGAGG | AGACGAACCC | GTGGATGGAC |
| <b>KCS3Fdes</b> | -----      | -----       | -----      | -----      | -----      |
| <b>KCS3FWT</b>  | -----      | -----       | -----      | -----      | -----      |
| <b>Kcs2Rdes</b> | -----      | -----       | -----      | -----      | -----      |
| <b>Kcs2RWT</b>  | -----      | -----       | -----      | -----      | -----      |
| <b>KCS3Rdes</b> | GGGCGCTCCG | GTCGGTGAAC  | CCGGCGGAGG | AGACGAACCC | GTGGATGGAC |
| <b>KCS3RWT</b>  | GGGCGCTCCG | GTCGGTGAAC  | CCGGCGGAGG | AGACGAACCC | GTGGATGGAC |
|                 | .... ....  | .... ....   | .... ....  | .... ....  | .... ....  |
|                 | 1510       | 1520        | 1530       | 1540       | 1550       |
| <b>KcsB73</b>   | GAGATCGACA | GGTTTCCCGT  | GGATGTTCCC | AAGGTCTCTA | AGGTTTCAAG |
| <b>KCS3Fdes</b> | -----      | -----       | -----      | -----      | -----      |
| <b>KCS3FWT</b>  | -----      | -----       | -----      | -----      | -----      |
| <b>Kcs2Rdes</b> | -----      | -----       | -----      | ~~~~~      | ~~~~~      |
| <b>Kcs2RWT</b>  | -----      | -----       | -----      | ~~~~~      | ~~~~~      |
| <b>KCS3Rdes</b> | GAGATCGACA | GGTTTCCCGT  | GGATGTTCCC | AAGGTCTCTA | AGGTTTCAAG |
| <b>KCS3RWT</b>  | GAGATCGACA | GGTTTCCCGT  | GGATGTTCCC | AAGGTCTCTA | AGGTTTCAAG |
|                 | .... ....  | .... ....   | .... ....  | .... ....  | .... ....  |
|                 | 1560       | 1570        | 1580       | 1590       | 1600       |
| <b>KcsB73</b>   | CGACTGA--- | -----       | -----      | -----      | -----      |
| <b>KCS3Fdes</b> | -----      | -----       | -----      | -----      | -----      |
| <b>KCS3FWT</b>  | -----      | -----       | -----      | -----      | -----      |
| <b>Kcs2Rdes</b> | ~~~~~      | -----       | -----      | -----      | -----      |
| <b>Kcs2RWT</b>  | ~~~~~      | -----       | -----      | -----      | -----      |
| <b>KCS3Rdes</b> | CGACTGAAAT | GCATTGCTAG  | TTGCGTGAAT | GATGGAGCTT | GCAATTGTTT |
| <b>KCS3RWT</b>  | CGACTGAAAT | GCATTGCTAG  | TTGCGTGAAT | GATGGAGCTT | GCAATTGTTT |
|                 | .... ....  | .... ....   | .... ....  | .... ....  | .... ....  |

|                 | 1610       | 1620       | 1630       | 1640       | 1650  |
|-----------------|------------|------------|------------|------------|-------|
| <b>KcsB73</b>   | -----      | -----      | -----      | -----      | ----- |
| <b>KCS3Fdes</b> | -----      | -----      | -----      | -----      | ----- |
| <b>KCS3FWT</b>  | -----      | -----      | -----      | -----      | ----- |
| <b>Kcs2Rdes</b> | -----      | -----      | -----      | -----      | ----- |
| <b>Kcs2RWT</b>  | -----      | -----      | -----      | -----      | ----- |
| <b>KCS3Rdes</b> | GGATAGAAGA | -----      | -----      | -----      | ----- |
| <b>KCS3RWT</b>  | GGATAGAAGA | TCTGGTGGAA | TTTTTCATAG | TTCAT----- | ----- |
