# Supplementary material for: Stocky1, a Novel Gene Involved in Maize Seedling Development and Cuticle Integrity
Source: MDPI journal article supplement (doi:10.3390/plants11070847), 2022-03-23
Supplement: s1 [file s1]

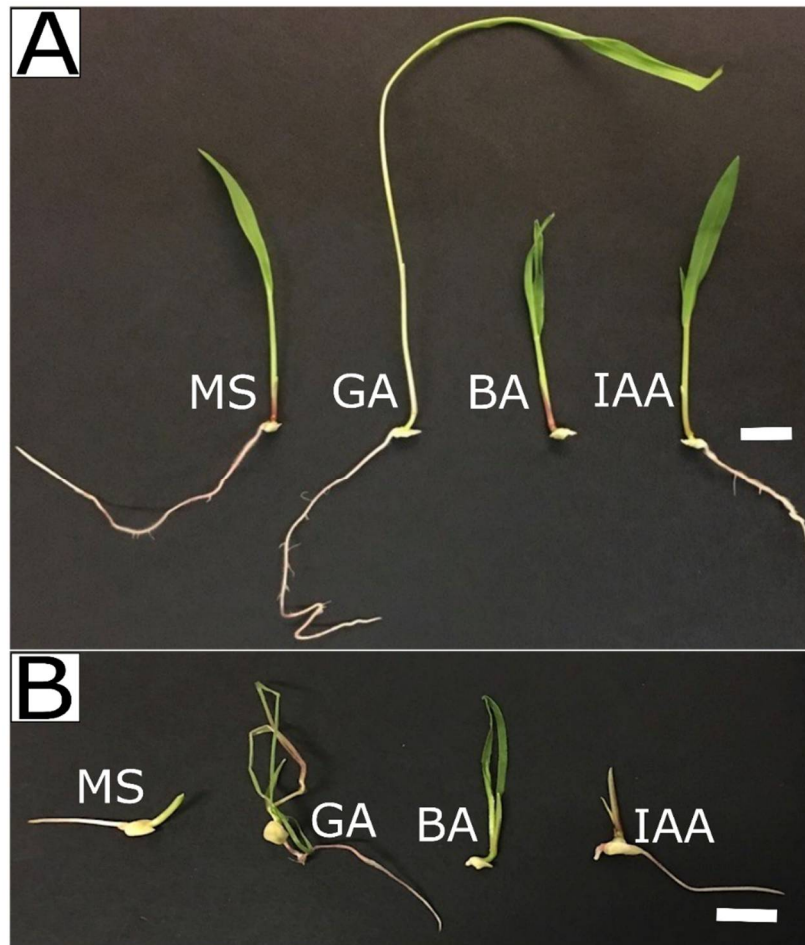

**Figure S1. Immature embryos cultured on MS medium supplemented with hormones.**

Normal seedlings (A) and *stocky1* homozygous seedling (B) after 10 DAC (Days after Culture). The embryos have been grown on MS medium (MS) or on MS medium supplemented with hormones (GA, BA, IAA) at a concentration of  $10^{-5}$  M. Scalebar: 1 cm.
