# Supplementary material for: Stocky1, a Novel Gene Involved in Maize Seedling Development and Cuticle Integrity
Source: MDPI journal article supplement (doi:10.3390/plants11070847), 2022-03-23
Supplement: s1 [file s1]

**Table S1. Table of primers.**

| <b>Name</b> | <b>Sequence 5'-3'</b> | <b>Information</b>                      |
|-------------|-----------------------|-----------------------------------------|
| ZmKCS-4F    | CATGGTGGTCAACCACTACAA | used for semi-quantitative PCR          |
| ZmKCS-4R    | TGATGTTCTCCGTGCTGATG  | used for semi-quantitative PCR          |
| ZmKCS-3F    | CTTCAGCTAGCCACATCTCTC | used for sequencing KCS coding sequence |
| ZmKCS-3R    | GTCGATCGCCTTTCCTATCTC | used for sequencing KCS coding sequence |
| ZmKCS-1F    | CGCACGTAGGACAACTGATAA | used for sequencing KCS coding sequence |
| ZmKCS-2R    | GATGTACGGCTTCACCTTCTT | used for sequencing KCS coding sequence |
| ORP1-F      | AAGGACGTGCACACCGC     | used for semi-quantitative PCR          |
| ORP1-R      | CAGATACAGAACAACAACCTC | used for semi-quantitative PCR          |
