# Supplementary material for: Stocky1, a Novel Gene Involved in Maize Seedling Development and Cuticle Integrity
Source: MDPI journal article supplement (doi:10.3390/plants11070847), 2022-03-23
Supplement: s1 [file s1]

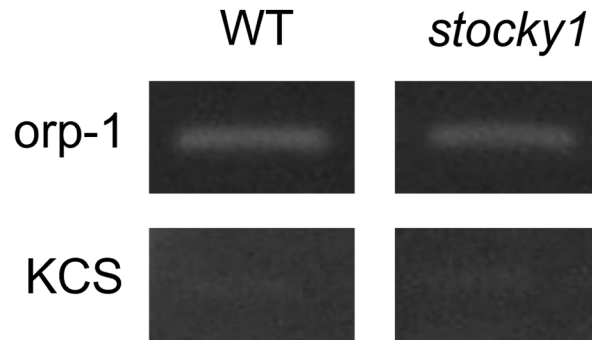

**Figure S3. Semi quantitative RT-PCR analysis of the KCS candidate gene.**

In the first lane are shown the bands of the *orp-1* gene, the house-keeping gene which has been used to normalize the quantity of the cDNA between wild type and the mutant *stocky1*. The bands shown in the second lane are referring to the KCS candidate gene, and the amplification is weak in both the cDNA obtained from wild- type and the *des<sup>\*</sup>-19* seedlings.
